# Supplementary material
Source: PubMed Central journal article supplement (PMC2546503)
Supplement: NIHMS62732-supplement-1si20070804_07.pdf [file NIHMS62732-supplement-1si20070804_07.pdf]

Supporting Information:

Complete author list for references 21 and 30:

(21) Vonitzstein, M.; Wu, W. Y.; Kok, G. B.; Pegg, M. S.; Dyason, J. C.; Jin, B.; Phan, T. V.; Smythe, M. L.; White, H. F.; Oliver, S. W.; Colman, P. M.; Varghese, J. N.; Ryan, D. M.; Woods, J. M.; Bethell, R. C.; Hotham, V. J.; Cameron, J. M.; Penn, C. R. *Nature* **1993**, *363*, 418-423.

(30) Kaila, N.; Somers, W. S.; Thomas, B. E.; Thakker, P.; Janz, K.; DeBernardo, S.; Tam, S.; Moore, W. J.; Yang, R. Y.; Wrona, W.; Bedard, P. W.; Crommie, D.; Keith, J. C.; Tsao, D. H. H.; Alvarez, J. C.; Ni, H.; Marchese, E.; Patton, J. T.; Magnani, J. L.; Camphausen, R. T. *J. Med. Chem.* **2005**, *48*, 4346-4357.
